# Supplementary material for: PPARγ Promotes Urothelial Remodeling During Urinary Tract Obstruction
Source: Research Square preprint supplement (doi:10.21203/rs.3.rs-5234950/v1), 2024-12-02
Supplement: Supplementary file 1 [file 0d5e951988b4100a89d75e35.pdf]

## SUPPLEMENTARY FIGURES LEGENDS

### **Supplementary Figure 1. scRNA-seq demonstrates increased proportion of urothelial cells and increased urothelial gene expression during UUO.**

**a** Graph shows the proportion of *Upk1a*, *Upk1b*, *Upk2*, *Upk3a*, *Krt5*, and *Krt14* expressing urothelial cells at baseline (POD0) and at UUO POD2, POD4, POD6, POD10, and POD14. **b** Dotplot of canonical urothelial marker genes at baseline and UUO.

### **Supplementary Figure 2. UUO leads to increased UPK1A and UPK1B which are altered during conditional manipulation of PPAR $\gamma$ .**

**a-c** Representative micrographs show anti-UPK1A, -UPK1B, -KRT5, and Hoechst labeling (and individual color channels) in the renal urothelium of SHAM and POD7 kidneys (**a**), *Pparg*<sup>fl/fl</sup> and *Upk2*<sup>CreERT2</sup>;*Pparg*<sup>fl/fl</sup> (*Pparg*<sup>LOF</sup>) mice at POD7 (**b**), and *VP16-Pparg*<sup>fl</sup> and *Upk2*<sup>CreERT2</sup>;*VP16-Pparg*<sup>fl</sup> (*Pparg*<sup>GOF</sup>) mice at POD7 (**c**). White dashed line: renal urothelium basement membrane; L: lumen; Yellow arrowhead: UPK1A+ UPK1B+ cell. SHAM (n=4 mice), POD7 (n=4 mice).

### **Supplementary Figure 3. UUO leads to increased UPK3A and FABP4 which are altered during conditional manipulation of PPAR $\gamma$ .**

**a** Representative micrographs show anti-FABP4, -UPK3A, -KRT5, and Hoechst labeling (and individual color channels) in the renal urothelium of SHAM and POD7 kidneys. White dashed line: renal urothelium basement membrane; L: lumen; Red arrowhead: FABP4+ UPK+ cell. **b** Graph shows the relative fold change of *Upk3a* mRNA levels in the kidneys of SHAM and POD7 mice normalized to *Gapdh*. Sham (n=4 mice), POD7 (n=4 mice). Bars: mean; Error bars: SD; P values: Unpaired Two-Tailed T test. **c** Representative micrographs show anti-FABP4, -UPK3A, -

KRT5, and Hoechst labeling (and individual color channels) in the renal urothelium of *Pparg*<sup>fl/fl</sup> and *Upk2*<sup>CreERT2</sup>;*Pparg*<sup>fl/fl</sup> (*Pparg*<sup>LOF</sup>) mice at POD7. White dashed line: renal urothelium basement membrane; L: lumen; Red arrowhead: FABP4+ UPK+ cell. **d** Graph shows the relative fold change of *Upk3a* mRNA levels in the kidneys of *Pparg*<sup>fl/fl</sup> and *Upk2*<sup>CreERT2</sup>;*Pparg*<sup>fl/fl</sup> (*Pparg*<sup>LOF</sup>) mice at POD7, normalized to *Gapdh*. *Pparg*<sup>fl/fl</sup> (n=4 mice), *Pparg*<sup>LOF</sup> (n=6 mice). Bars: mean; Error bars: SD; P values: Unpaired Two-Tailed T test. **e** Representative micrographs show anti-FABP4, -UPK3A, -KRT5, and Hoechst labeling (and individual color channels) in the renal urothelium of *VP16-Pparg*<sup>fl</sup> and *Upk2*<sup>CreERT2</sup>;*VP16-Pparg*<sup>fl</sup> (*Pparg*<sup>GOF</sup>) mice at POD7. White dashed line: renal urothelium basement membrane; L: lumen; Red arrowhead: FABP4+ UPK+ cell. **f** Graph shows the relative fold change of *Upk3a* mRNA levels in the kidneys of *VP16-Pparg*<sup>fl</sup> and *Upk2*<sup>CreERT2</sup>;*VP16-Pparg*<sup>fl</sup> (*Pparg*<sup>GOF</sup>) mice at POD7, normalized to *Gapdh*. *VP16-Pparg*<sup>fl</sup> (n=7 mice), *Pparg*<sup>GOF</sup> (n=5 mice). Bars: mean; Error bars: SD; P values: Mann-Whitney test was used due to nonparametric data distribution in *VP16-Pparg*<sup>fl</sup> cohort.

**Supplementary Figure 4. Conditional manipulation of PPAR $\gamma$  alters both PPAR $\gamma$  and UPK3A expression.**

**a** Representative micrographs show anti-PPARG, -UPK3A, -KRT5 labeling in bladder, contralateral kidney (normal) renal urothelium and POD7 renal urothelium in *Pparg*<sup>fl/fl</sup> and *Upk2*<sup>CreERT2</sup>;*Pparg*<sup>fl/fl</sup> (*Pparg*<sup>LOF</sup>) mice. White dashed line: urothelium basement membrane; L: lumen. White Arrowhead: PPARG+ UPK+ cell. **b** Representative micrographs show anti-PPARG, -UPK3A, -KRT5 labeling in bladder, contralateral kidney (normal) renal urothelium and POD7 renal urothelium in *VP16-Pparg*<sup>fl</sup> and *Upk2*<sup>CreERT2</sup>;*VP16-Pparg*<sup>fl</sup> (*Pparg*<sup>GOF</sup>) mice. White dashed line: urothelium basement membrane; L: lumen. White Arrowhead: PPARG+ UPK+ cell. **c**

Representative sonograph shows kidneys in *Pparg*<sup>fl/fl</sup> and *Pparg*<sup>LOF</sup> mice without UUO. **d**

Representative sonograph shows kidneys in *VPI6-Pparg*<sup>fl</sup> and *Pparg*<sup>GOF</sup> mice without UUO.

**Supplementary Figure 5. Annotation of sonograms for renal parenchyma measurements.**

Annotated longitudinal images of POD7 kidneys. Images are captured at the largest longitudinal plane of the kidney. Dashed white line: longitudinal renal length (LRL – to which all measurements lines are perpendicular); red line: transverse renal width (TRW); white line: renal pelvis diameter (RPD); blue line: renal papilla width (RPW); Asterisk (\*): renal pelvis. The fractional percentage of parenchyma is calculated as  $([TRW - RPD] + RPW)/TRW$ .
