# Supplementary material for: PPARγ Promotes Urothelial Remodeling During Urinary Tract Obstruction
Source: Research Square preprint supplement (doi:10.21203/rs.3.rs-5234950/v1), 2024-12-02
Supplement: Supplementary file 2 [file 3e81ab9f9238ffc16594f160.pdf]

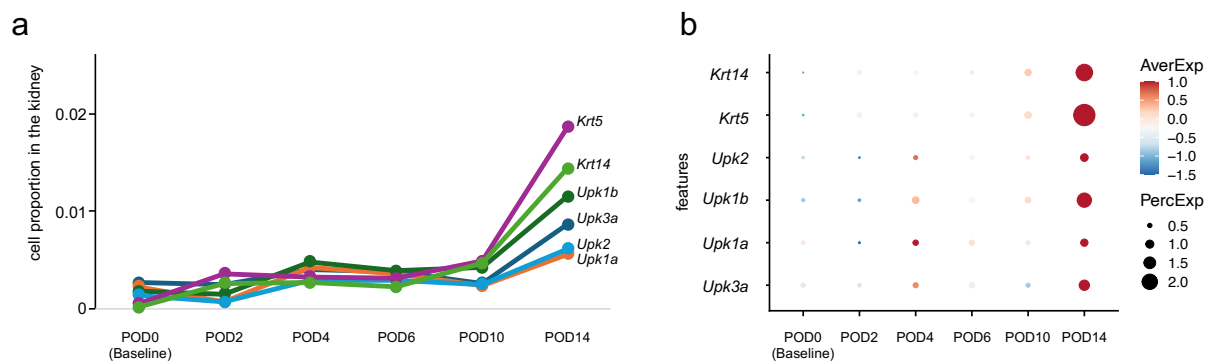

**Supplementary Figure 1. scRNA-seq demonstrates increased proportion of urothelial cells and increased urothelial gene expression during UUO.**

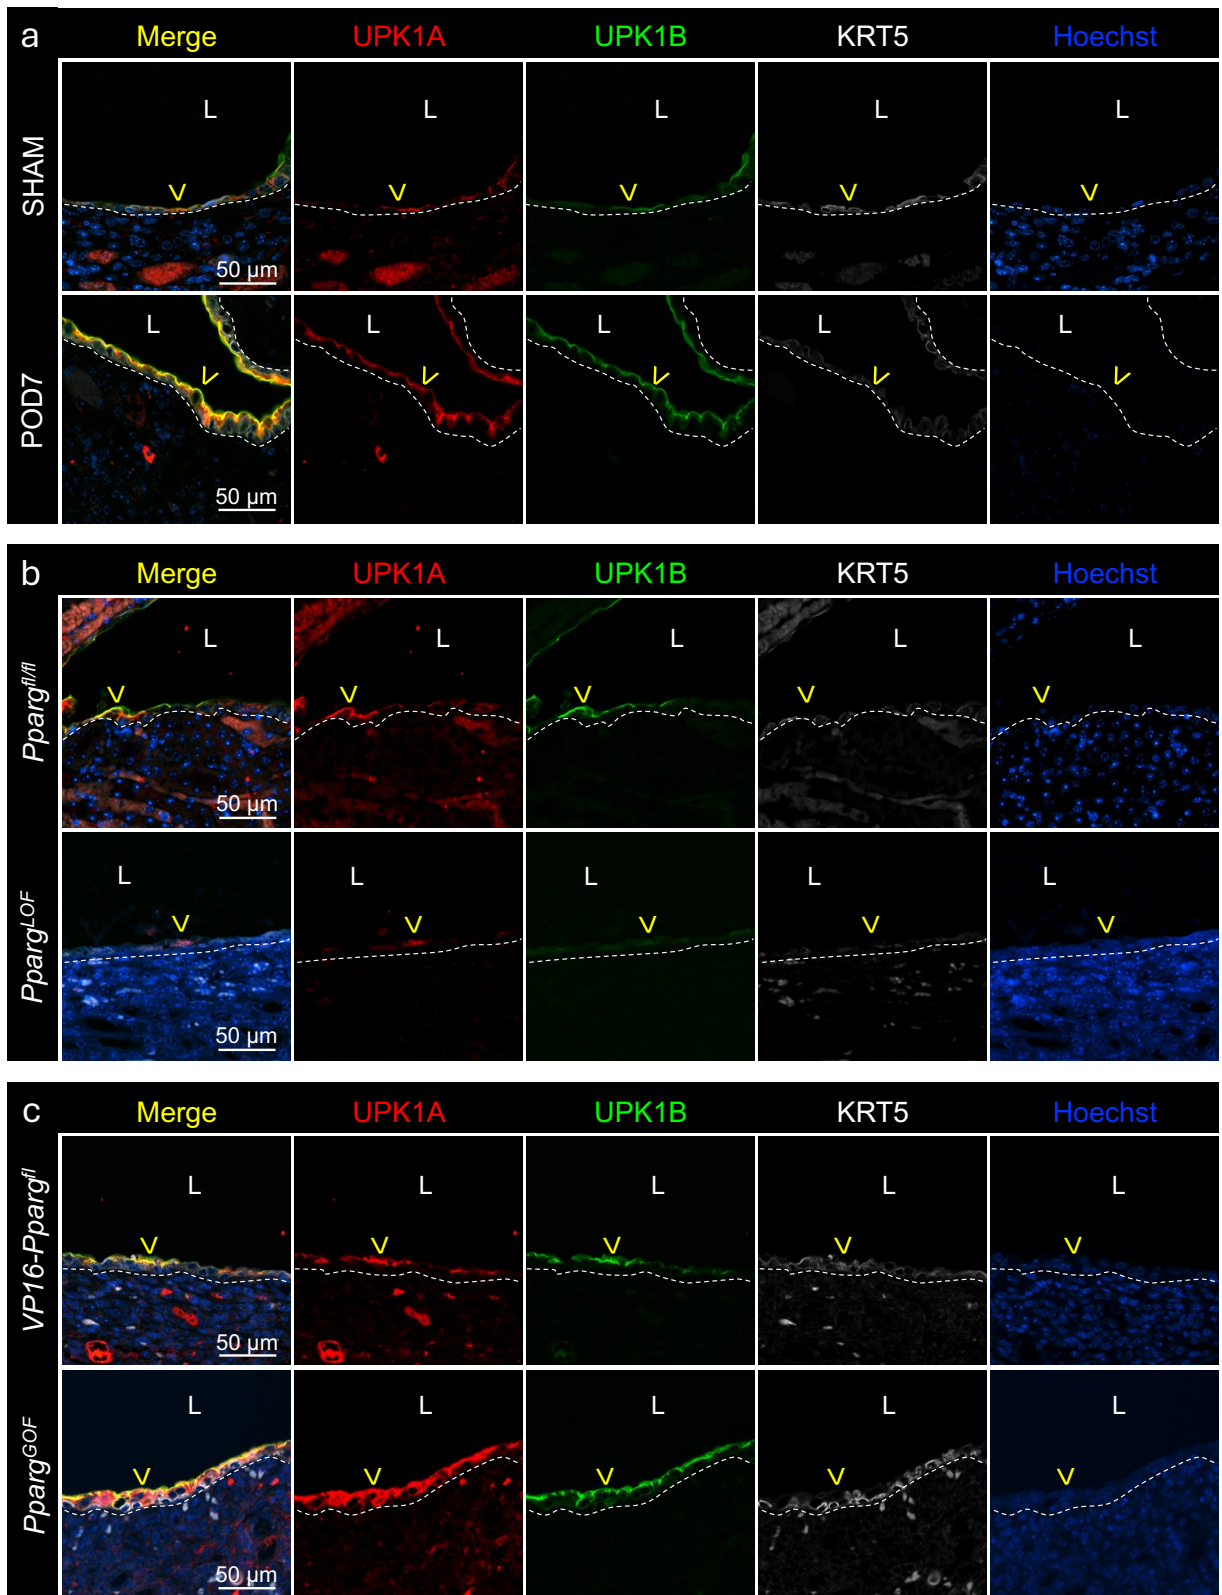

**Supplementary Figure 2. UO leads to increased UPK1A and UPK1B which are altered during conditional manipulation of PPAR $\gamma$ .**

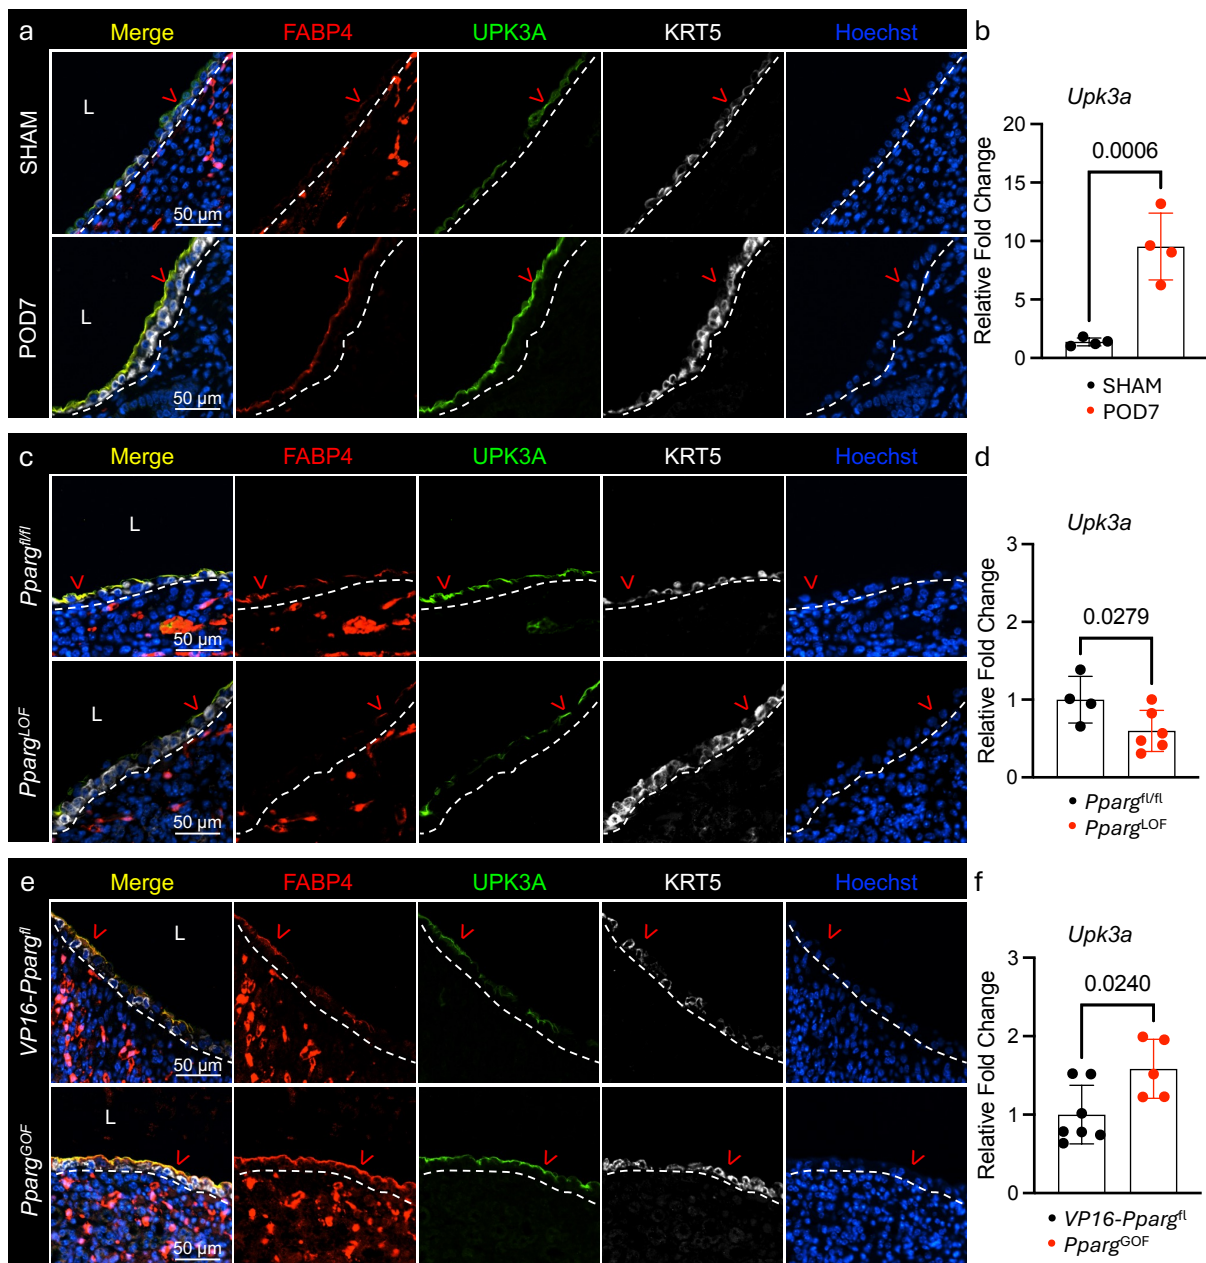

**Supplementary Figure 3. UO leads to increased UPK3A and FABP4 which are altered during conditional manipulation of PPAR $\gamma$ .**

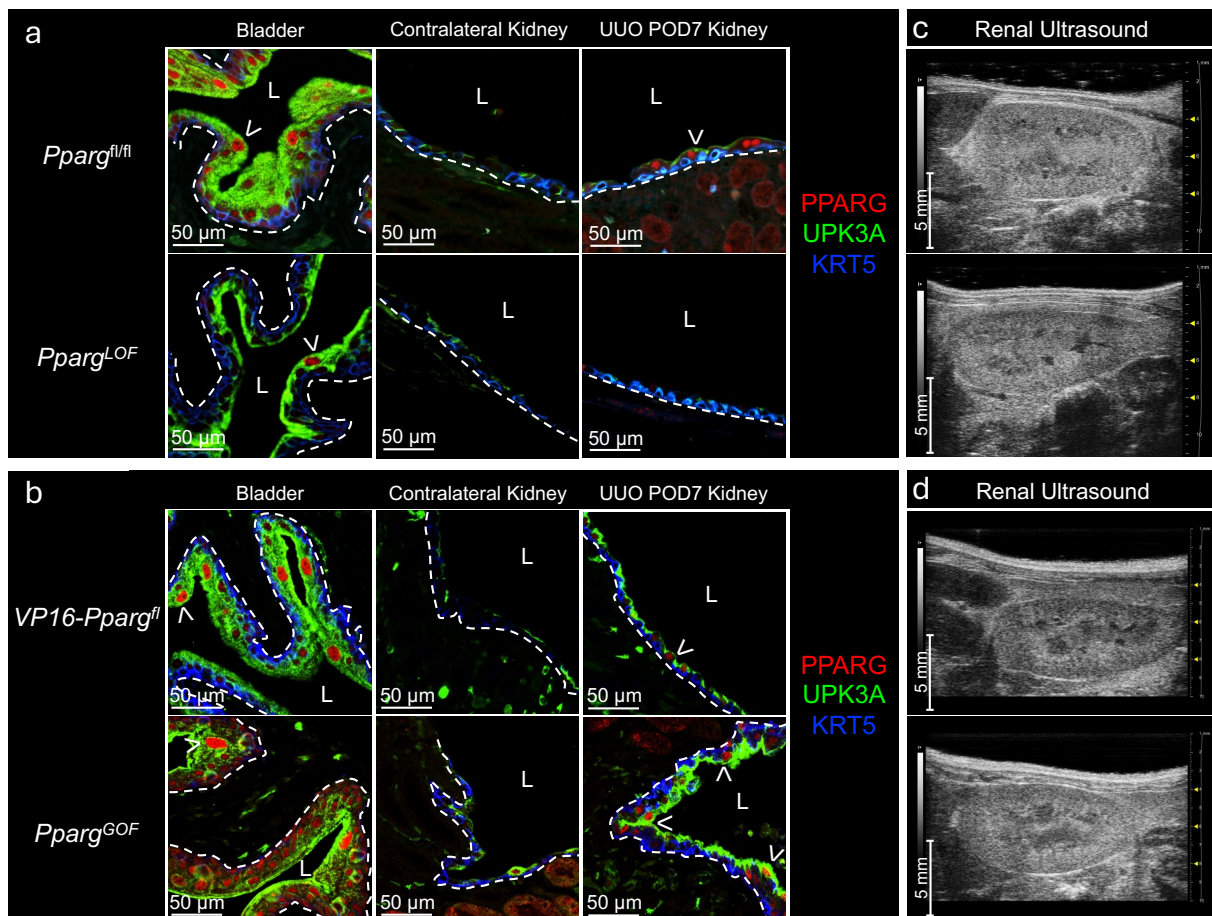

**Supplementary Figure 4. Conditional manipulation of PPAR $\gamma$  alters both PPARG and UPK3A expression.**



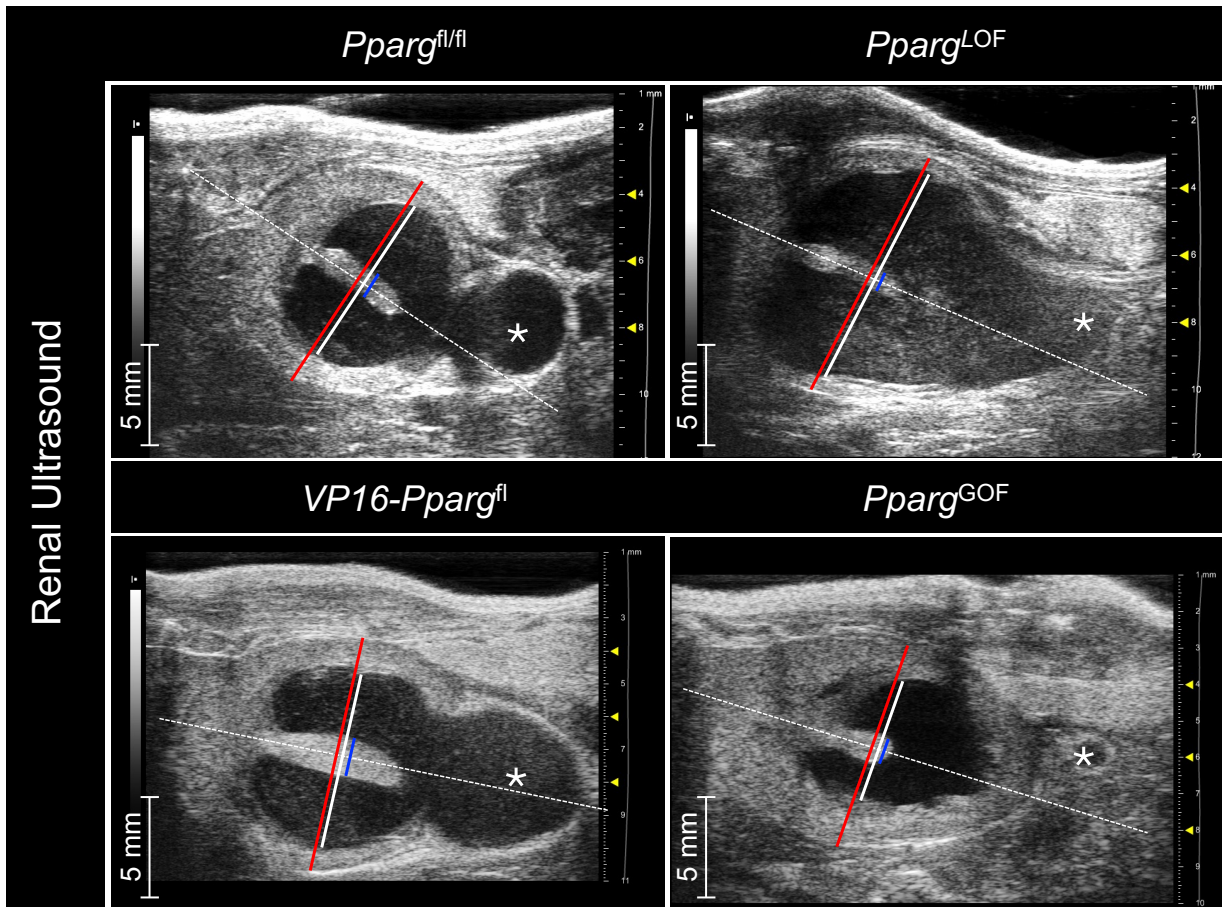

Supplementary Figure 5. Annotation of sonograms for renal parenchyma measurements.
